# Prevalence of Isolated Systolic and Isolated Diastolic Hypertension Subtypes in China

Jianfeng Huang, Rachel P. Wildman, Dongfeng Gu,  
Paul Muntner, Shaoyong Su, and Jiang He

**Background:** Isolated systolic hypertension (ISH), more so than any other hypertension subtype, increases the risk for stroke and coronary heart disease. The prevalence of ISH versus other hypertension subtypes in the general Chinese adult population is not known.

**Methods:** The prevalence of isolated systolic and isolated diastolic hypertension (IDH) was examined in a representative national sample of 15,540 Chinese adults aged 35 to 74 years. Three seated blood pressure (BP) measurements taken after 5 min of rest were averaged and hypertension subtypes were defined among individuals not receiving antihypertensive therapy as follows: ISH as systolic BP  $\geq 140$  mm Hg and diastolic BP  $< 90$  mm Hg; IDH as systolic BP  $< 140$  mm Hg and diastolic BP  $\geq 90$  mm Hg; and combined systolic/diastolic hypertension (SDH) as a systolic BP  $\geq 140$  mm Hg and diastolic BP  $\geq 90$  mm Hg.

**Results:** Overall, 7.6% of the Chinese adult population had ISH, 7.4% had SDH, and 4.4% had IDH. The prevalence of ISH increased with age and was more common in older women than in older men. Stage 1 hypertension was much more prevalent than stage 2 hypertension among all hypertension subtypes. The prevalence of SDH, IDH, and ISH (women, only) were higher in northern China than southern. The prevalence of ISH and SDH (women, only) were higher among rural residents versus urban residents.

**Conclusions:** These data document high rates of ISH in China. Given the risk of cardiovascular disease associated with ISH, our findings underscore the critical need for enhanced hypertension screening and treatment programs in China. Am J Hypertens 2004;17:955-962 © 2004 American Journal of Hypertension, Ltd.

**Key Words:** Isolated systolic hypertension, isolated diastolic hypertension, China, population, cross-sectional survey.

As in Western populations, cardiovascular disease is now the leading cause of death in China, with mortality projected to increase over the next decade.<sup>1,2</sup> Hypertension is an important modifiable risk factor for cardiovascular disease, and its prevalence in China has increased. Data from the International Collaborative Study of Cardiovascular Disease in Asia (InterASIA) reported a hypertension prevalence of 25.8% in men and 28.6% in women for the years 2000 to 2001, which is up from 19.1% and 20.2%, respectively, in the 1991 Chinese National Hypertension Survey.<sup>3,4</sup>

Although early hypertension guidelines focused on the diagnosis and treatment of elevated diastolic blood pressure (BP), isolated systolic hypertension (ISH) is now known to carry greater cardiovascular disease risk. Both observational epidemiologic and clinical trial data have demonstrated that elevated systolic BP confers significantly increased risk of stroke, coronary heart disease, and end-stage renal disease, especially in individuals  $\geq 65$  years of age.<sup>5</sup>

National data on the prevalence of isolated systolic and isolated diastolic hypertension (IDH) in China have never

Received February 20, 2004. First decision April 7, 2004. Accepted June 4, 2004.

From the Cardiovascular Institute and Fu Wai Hospital (JH, DG, SS), Chinese Academy of Medical Sciences and Peking Union Medical College, Beijing, People's Republic of China; Department of Epidemiology (RPW, PM, JH), Tulane University School of Public Health and Tropical Medicine, New Orleans, Louisiana; Department of Medicine (PM, JH), Tulane University School of Medicine, New Orleans, Louisiana; and Tulane Hypertension and Renal Disease Center of Excellence (PM, JH), Tulane University Health Sciences Center, New Orleans, Louisiana.

This study was funded by a contractual agreement between Tulane University and Pfizer Inc. (New York, NY). Several researchers employed by Pfizer Inc. were members of the steering committee that designed the study; however, the study was conducted, analyzed, and interpreted by the investigators independently of the sponsor. Dr. Wildman received partial support for the analysis and interpretation of these data from National Institutes of Health (Bethesda, MD) grant 1 K12 HD43451-01. Doctor He also received support from National Heart, Lung, and Blood Institutes (Bethesda, MD)/National Institutes of Health grants HL68057 and HL72507.

Address correspondence and reprint requests to Dr. Rachel P. Wildman, Department of Epidemiology, Tulane University School of Public Health and Tropical Medicine, 1440 Canal Street, Suite 2000, SL-18, New Orleans, LA 70112; e-mail:rwildman@tulane.edu

**Table 1.** Prevalence of stage 1 and 2 hypertension by isolated systolic hypertension (ISH), isolated diastolic hypertension (IDH), and combined systolic/diastolic hypertension subtypes in China, 2000–2001

| Age (y) | Treated    |           | Untreated SDH |           | Untreated IDH |           | Untreated ISH |            |
|---------|------------|-----------|---------------|-----------|---------------|-----------|---------------|------------|
|         | Controlled | Stage 1   | Stage 2       | Stage 1   | Stage 2       | Stage 1   | Stage 2       | Stage 2    |
|         |            |           |               |           |               |           |               |            |
| Men     |            |           |               |           |               |           |               |            |
| 35–44   | 0.7 (0.2)  | 1.6 (0.3) | 0.1 (0.06)    | 4.3 (0.5) | 0.8 (0.2)     | 7.0 (0.6) | 0.8 (0.2)     | 2.0 (0.3)  |
| 45–54   | 1.7 (0.4)  | 3.3 (0.5) | 1.7 (0.4)     | 7.2 (0.7) | 1.9 (0.4)     | 6.6 (0.7) | 0.3 (0.2)     | 4.7 (0.7)  |
| 55–64   | 3.0 (0.6)  | 5.3 (0.7) | 2.7 (0.5)     | 9.7 (1.0) | 4.0 (0.6)     | 2.9 (0.5) | 0.4 (0.2)     | 10.6 (1.1) |
| 65–74   | 3.6 (0.8)  | 7.3 (1.2) | 3.4 (0.9)     | 8.8 (1.2) | 2.9 (0.9)     | 1.2 (0.5) | 0.4 (0.2)     | 14.2 (1.6) |
| 35–74*  | 1.8 (0.2)  | 3.5 (0.3) | 1.5 (0.2)     | 6.7 (0.4) | 2.0 (0.2)     | 5.4 (0.4) | 0.5 (0.1)     | 5.9 (0.4)  |
| Women   |            |           |               |           |               |           |               |            |
| 35–44   | 0.9 (0.2)  | 1.1 (0.2) | 0.3 (0.1)     | 2.3 (0.3) | 0.5 (0.1)     | 3.0 (0.4) | 0.5 (0.2)     | 1.9 (0.3)  |
| 45–54   | 3.1 (0.5)  | 5.1 (0.6) | 1.8 (0.4)     | 6.1 (0.7) | 1.0 (0.3)     | 3.1 (0.5) | 0.2 (0.2)     | 5.4 (0.7)  |
| 55–64   | 4.1 (0.7)  | 6.1 (0.7) | 4.2 (0.7)     | 7.9 (0.9) | 1.9 (0.4)     | 1.7 (0.4) | 0.1 (0.09)    | 10.2 (1.0) |
| 65–74   | 5.2 (1.0)  | 7.5 (1.2) | 4.0 (0.8)     | 6.6 (1.1) | 1.1 (0.4)     | 1.0 (0.3) | 0.2 (0.2)     | 19.3 (1.8) |
| 35–74*  | 2.7 (0.2)  | 4.1 (0.3) | 1.9 (0.20)    | 5.0 (0.3) | 1.0 (0.1)     | 2.5 (0.2) | 0.3 (0.1)     | 6.7 (0.4)  |
|         |            |           |               |           |               |           |               | 1.5 (0.2)  |

Values are % (SE).

\* Age-standardized.

been reported. In this study we report the prevalence of combined systolic and diastolic hypertension, IDH, and ISH in the general Chinese adult population, by age, sex, geographic region, and degree of urbanization. This information may aid in the development of targeted hypertension screening and treatment programs in China aimed at the prevention of the large and increasing burden of cardiovascular disease morbidity and mortality.

## Methods

### Study Population

The methods of the International Collaborative Study of Cardiovascular Disease in Asia (InterASIA) have been previously published.<sup>6</sup> InterASIA used a four-stage stratified sampling method to select a nationally representative sample of the general adult population in China aged 35 to 74 years. The sample process was stratified by rural versus urban areas and North versus South, as divided by the Yangtzi River. North China consisted of the Beijing municipality as well as the Jilin, Shandong, Qinghai, and Shanxi provinces, whereas South China consisted of the Shanghai municipality as well as the Sichuan, Hubai, Fujian, and Guangxi provinces. The final stage of sampling was stratified by sex (50% men and 50% women) and by age distribution based on 1990 China census data. Only one participant was selected from each household, without replacement.

A total 19,012 individuals were randomly selected from 20 primary sampling units (street districts in urban areas, or townships in rural areas) and invited to participate. A total of 15,838 individuals completed the survey and examination, yielding a response rate of 83.3% (82.1% in men and 84.5% in women; 82.2% in urban areas and 84.4% in rural areas). Of these individuals, 298 were excluded for being outside the age range, leaving 15,540 in the range of 35 to 74 years.

### Measurement of BP

Data collection was conducted in examination centers at local health stations or in community clinics in the participants' residential area in the autumn of 2000 and the spring of 2001, months during which the temperature in China is mild, so as to have negligible effects on BP measures. For a few individuals who could not attend examinations at the clinic, home visits were conducted. During examinations, a standard questionnaire including age, gender, hypertension diagnosis, and treatment information was administered by trained research staff.

Three BP measurements were obtained in the sitting position after at least 5 min of rest by trained nurses and physicians according to a common protocol adapted from American Heart Association recommendations.<sup>7</sup> A standard mercury sphygmomanometer was used with one of four cuff sizes (pediatric, regular adult, large adult, or

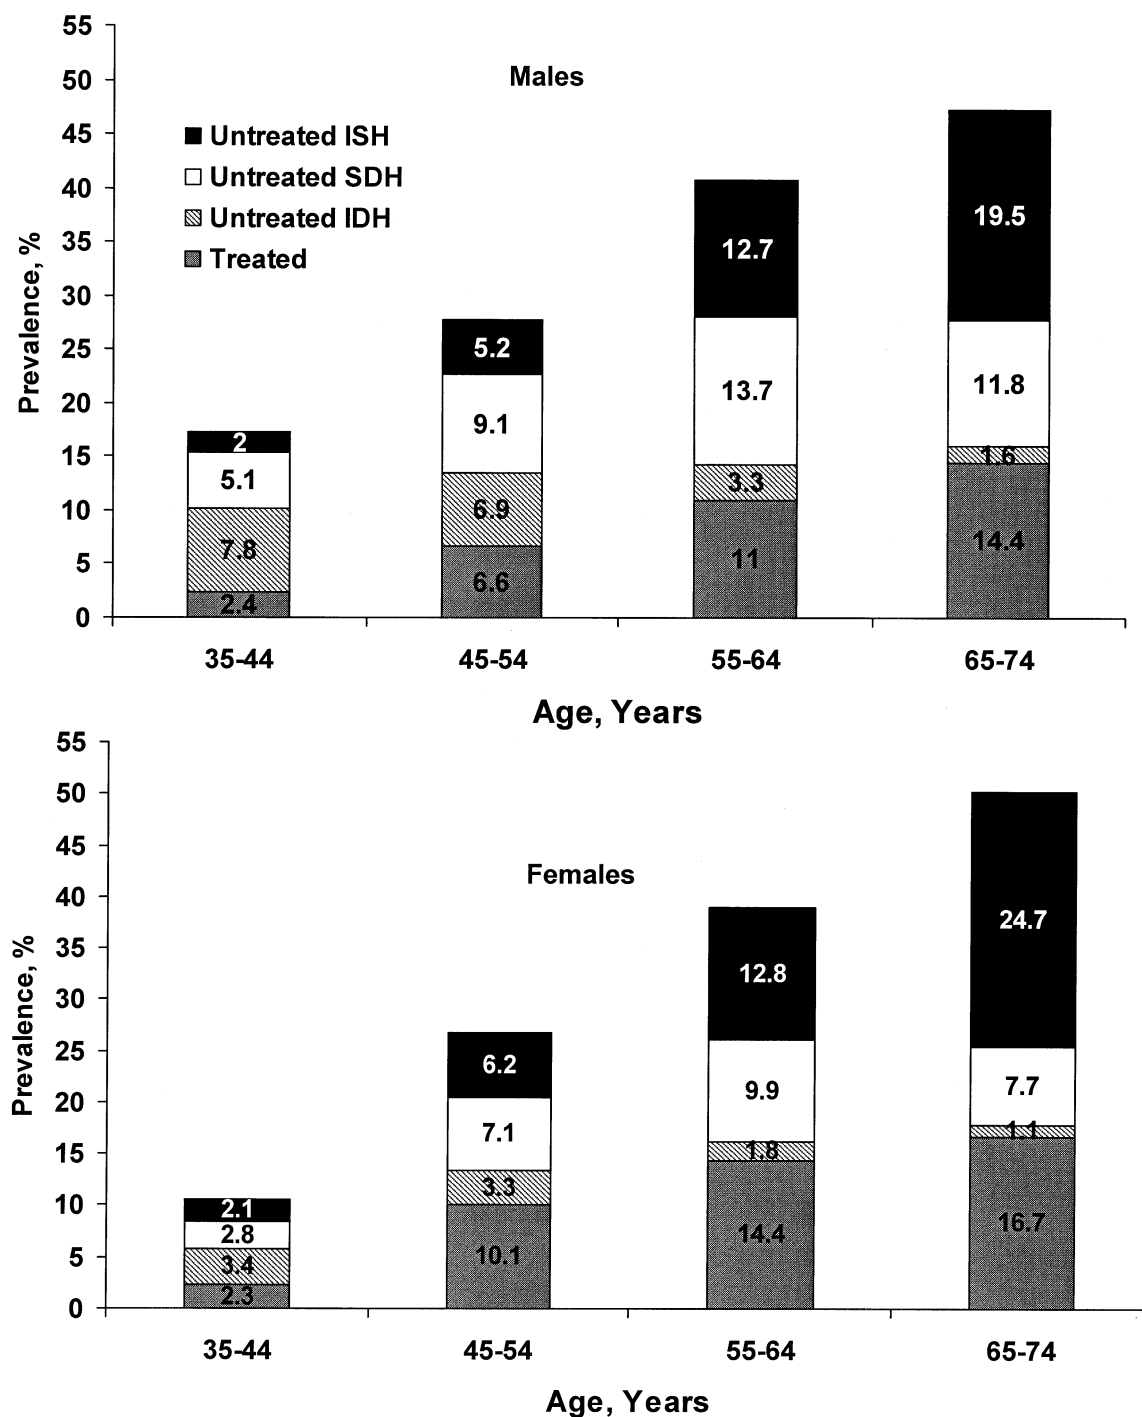

**FIG. 1.** Prevalence of isolated systolic and diastolic hypertension among men (**upper panel**) and women (**lower panel**) by age group. IDH = isolated diastolic hypertension; ISH = isolated systolic hypertension; SDH = combined systolic/diastolic hypertension.

thigh) based on the participant's arm circumference. Participants were advised to refrain from coffee, tea, or alcohol intake, cigarette smoking, and exercise beginning at least 30 min before their examination.

All study investigators and staff members successfully completed a training program orienting them both to the aims of the study and to the specific tools and methodologies used. At the training sessions, interviewers were

given detailed instructions on administration of the study questionnaire. All BP observers participated in a special training session on the use of the standardized BP measurement protocol. Requirements for certification as an InterASIA BP observer consisted of satisfactory performance on: a written test assessing knowledge of preparation of study participants for BP measurement, selection of appropriate cuff size, and standard BP measurement tech-

**Table 2.** Mean systolic blood pressure (BP) and diastolic blood pressure (DBP) levels by JNC-VII categories in China, 2000–2001

| Age (y)      | Normotensive |            | Prehypertension |            | Treated     |            |
|--------------|--------------|------------|-----------------|------------|-------------|------------|
|              | SBP          | DBP        | SBP             | DBP        | SBP         | DBP        |
| <b>Men</b>   |              |            |                 |            |             |            |
| 35–44        | 109.1 (0.3)  | 71.1 (0.2) | 123.7 (0.3)     | 81.1 (0.2) | 139.2 (2.0) | 94.5 (1.6) |
| 45–54        | 108.8 (0.4)  | 71.1 (0.3) | 123.7 (0.4)     | 81.3 (0.2) | 145.6 (2.4) | 95.1 (1.4) |
| 55–64        | 108.9 (0.5)  | 69.8 (0.4) | 126.8 (0.4)     | 78.8 (0.4) | 150.8 (2.7) | 90.6 (1.6) |
| 65–74        | 109.1 (0.7)  | 67.9 (0.8) | 127.8 (0.6)     | 77.1 (0.5) | 153.5 (2.7) | 84.5 (1.3) |
| 35–74*       | 109.0 (0.2)  | 70.4 (0.2) | 124.8 (0.2)     | 80.2 (0.1) | 145.1 (1.2) | 92.7 (0.8) |
| <b>Women</b> |              |            |                 |            |             |            |
| 35–44        | 106.2 (0.2)  | 69.6 (0.2) | 122.9 (0.3)     | 80.0 (0.2) | 142.0 (2.7) | 90.0 (1.7) |
| 45–54        | 107.6 (0.3)  | 70.2 (0.3) | 125.1 (0.4)     | 79.9 (0.3) | 148.4 (2.1) | 90.4 (1.1) |
| 55–64        | 108.3 (0.4)  | 69.3 (0.4) | 126.4 (0.4)     | 77.8 (0.4) | 150.0 (1.9) | 85.8 (1.1) |
| 65–74        | 109.2 (0.9)  | 66.7 (0.9) | 127.9 (0.5)     | 74.8 (0.7) | 151.6 (2.3) | 83.4 (1.2) |
| 35–74*       | 107.4 (0.2)  | 69.3 (0.2) | 124.8 (0.2)     | 78.9 (0.2) | 146.6 (1.3) | 88.5 (0.8) |

JNC = Joint National Committee on Prevention, Detection, Evaluation, and Treatment of High Blood Pressure; other abbreviations as in Table 1.

Values are mean (SE).

\* Age-standardized.

niques; a standardized videotape examination; and concordant BP measurements with an instructor.

Hypertension was defined as an average systolic BP (SBP)  $\geq 140$  mm Hg, an average diastolic BP (DBP)  $\geq 90$  mm Hg, or self-reported use of antihypertensive medication within the past 2 weeks.<sup>8</sup> Hypertension subtypes were defined for individuals not reporting current antihypertensive treatment as follows: combined systolic/diastolic hypertension (SDH) was defined as an average SBP  $\geq 140$  mm Hg and an average DBP  $\geq 90$  mm Hg; IDH was defined as an average SBP  $< 140$  mm Hg and an average DBP  $\geq 90$  mm Hg, and ISH was defined as an average SBP  $\geq 140$  mm Hg and an average DBP  $< 90$  mm Hg. Individuals reporting current antihypertensive treatment were categorized together as one group (treated) irrespective of their actual BP values. Prehypertension was defined according to the Joint National Committee on Prevention, Detection, Evaluation, and Treatment of High Blood Pressure (JNC-VI) criteria for both systolic (120 to 139 mm Hg) and diastolic (80 to 89 mm Hg) BP.<sup>9</sup> Stage 1 hypertension was defined as either SBP  $\geq 140$  and  $< 160$  mm Hg or DBP  $\geq 90$  and  $< 100$  mm Hg. Stage 2 hypertension was defined as SBP  $\geq 160$  mm Hg or DBP  $\geq 100$  mm Hg.

The Institutional Review Board at Tulane University Health Sciences Center approved the InterASIA study. In addition, ethics committees and other relevant regulatory bodies in China approved the study. Informed consent was obtained from each participant before data collection. During the study, participants with untreated conditions were referred to their usual primary health care provider.

## Statistical Analysis

The InterASIA study was designed to provide precise estimates of prevalence for all stratification groups (men, women, north, south, urban, rural) in each of the four age

groups (35 to 44 years, 45 to 54 years, 55 to 64 years, and 65 to 74 years). The InterASIA sample size was estimated to meet generally recommended requirements for precision in a complex survey.<sup>10</sup>

Prevalence and mean BP levels were weighted to represent the total Chinese population aged 35 to 74 years, representing an estimated 477 million individuals. Weights were calculated based on the 2000 China population census data and took into account several features of the survey including oversampling for specific age or geographic subgroups, nonresponse, and other demographic or geographic differences between the sample and total China population. Age standardization was performed by the direct method using the 2000 China population aged 35 to 74 years as the standard population. Prevalence of hypertension and its subtypes was calculated for northern and southern China, for urban and rural residents, and for men and women. North/south and urban/rural differences in age-standardized prevalence were tested via logistic regression. Standard errors for all analyses were calculated by a technique appropriate to the complex survey design. Analyses were conducted using SUDAAN, version 8.0 (Research Triangle Institute, Research Triangle Park, NC).

## Results

Overall, ISH was the predominant untreated hypertension subtype (7.6%), followed by SDH (7.4%) and IDH (4.4%), with 7.7% of adults reporting current antihypertensive treatment. The prevalence of ISH increased with age, whereas the prevalence of IDH decreased with age among both men and women (Table 1). The prevalence of SDH increased from 35 to 64 years in similar magnitude to ISH until the 65 to 74 year age group, in which SDH preva-

**Table 2.** Continued

| Untreated SDH |             | Untreated IDH |            | Untreated ISH |            |
|---------------|-------------|---------------|------------|---------------|------------|
| SBP           | DBP         | SBP           | DBP        | SBP           | DBP        |
| 151.6 (1.3)   | 100.8 (0.8) | 130.0 (0.7)   | 94.2 (0.4) | 146.5 (1.1)   | 82.2 (1.1) |
| 154.6 (1.4)   | 98.8 (0.6)  | 129.4 (0.8)   | 92.8 (0.4) | 146.3 (0.9)   | 81.9 (0.9) |
| 161.7 (1.7)   | 99.2 (0.8)  | 131.1 (1.1)   | 93.9 (0.7) | 150.8 (1.0)   | 81.3 (0.5) |
| 166.9 (3.3)   | 98.5 (1.4)  | 132.3 (2.0)   | 93.8 (1.3) | 154.8 (2.0)   | 80.3 (0.7) |
| 156.3 (0.8)   | 99.6 (0.4)  | 130.4 (0.5)   | 93.7 (0.3) | 148.3 (0.6)   | 81.7 (0.5) |
| 155.1 (1.9)   | 97.7 (0.8)  | 130.3 (0.8)   | 93.8 (0.6) | 146.9 (1.4)   | 83.3 (1.0) |
| 159.5 (1.6)   | 96.9 (0.6)  | 128.9 (1.3)   | 93.4 (0.6) | 149.3 (1.0)   | 83.9 (0.5) |
| 162.9 (2.0)   | 97.9 (0.8)  | 133.1 (1.2)   | 93.5 (1.0) | 153.0 (1.2)   | 82.2 (0.5) |
| 164.3 (2.2)   | 95.9 (0.7)  | 133.2 (2.4)   | 94.3 (1.5) | 152.6 (0.9)   | 79.4 (0.7) |
| 159.0 (1.0)   | 97.3 (0.4)  | 130.8 (0.6)   | 93.7 (0.4) | 149.5 (0.7)   | 82.8 (0.4) |

lence fell, whereas ISH prevalence increased dramatically, especially among women. Stage 1 hypertension was more prevalent than stage 2 hypertension among all hypertension subtypes and among treated individuals. This was consistent for all age groups and both sexes. For both SDH and IDH, the prevalence of stage 2 hypertension held constant or slightly decreased with increasing age group, whereas for ISH, the prevalence of stage 2 hypertension increased with increasing age group.

Figure 1 presents prevalence of hypertension subtypes for men and for women. IDH was the most common hypertension subtype in the age group 35 to 44 years for both men and women; SDH was the most common subtype in the age groups 45 to 54 years and 55 to 64 years for men, and in the age group 45 to 54 years for women; and ISH was the most common subtype in the age group 65 to 74 years for men and the age groups 55 to 64 years and 65 to 74 years for women. ISH was slightly more prevalent in

women than in men, whereas IDH was much more prevalent in men than in women.

Mean BP values for normotensive, prehypertensive, and treated and untreated hypertensive subjects are provided in Table 2. For all groups except those with IDH, mean SBP increased and mean DBP decreased with increasing age group among both men and women. For those with IDH, mean SBP increased slightly with increasing age group, whereas mean DBP did not increase with increasing age group.

For men, the prevalence of treated hypertension, and untreated SDH and IDH were higher in northern China than southern, whereas the prevalence of untreated ISH did not differ by region (Table 3). In addition, the prevalence of treated hypertension was higher and untreated ISH lower among urban residents compared with rural residents, whereas the prevalence of untreated SDH and IDH did not differ by degree of urbanization among men.

**Table 3.** Prevalence of hypertension subtypes by geographic region and urbanization in China, 2000–2001

|                               | Treated    | Untreated SDH | Untreated IDH | Untreated ISH |
|-------------------------------|------------|---------------|---------------|---------------|
| <b>Men</b>                    |            |               |               |               |
| North                         | 10.3 (0.7) | 11.2 (0.7)    | 8.1 (0.6)     | 7.4 (0.6)     |
| South                         | 4.2 (0.4)  | 6.9 (0.5)     | 4.3 (0.4)     | 7.0 (0.5)     |
| <i>P</i> value for difference | <.001      | <.001         | <.001         | .671          |
| Urban                         | 10.0 (0.5) | 9.5 (0.6)     | 6.4 (0.4)     | 6.2 (0.4)     |
| Rural                         | 6.0 (0.5)  | 8.5 (0.5)     | 5.8 (0.4)     | 7.4 (0.5)     |
| <i>P</i> value for difference | <.001      | .178          | .296          | .042          |
| <b>Women</b>                  |            |               |               |               |
| North                         | 11.6 (0.7) | 6.8 (0.5)     | 3.9 (0.5)     | 9.3 (0.7)     |
| South                         | 6.6 (0.5)  | 5.4 (0.5)     | 2.0 (0.3)     | 7.4 (0.5)     |
| <i>P</i> value for difference | <.001      | .054          | <.001         | .023          |
| Urban                         | 11.4 (0.5) | 5.0 (0.4)     | 2.7 (0.3)     | 6.9 (0.4)     |
| Rural                         | 8.0 (0.5)  | 6.2 (0.4)     | 2.8 (0.3)     | 8.6 (0.5)     |
| <i>P</i> value for difference | <.001      | .031          | .682          | .008          |

Values are % (SE).

\* Age-standardized.

For women, the prevalence of treated hypertension, and untreated IDH and ISH was higher in northern than in southern China; the prevalence of untreated SDH was slightly higher in northern than in southern China, although the difference was not statistically significant. Additionally, the prevalence of treated hypertension was higher and the prevalence of untreated SDH and ISH lower among urban compared with rural residents, whereas the prevalence of untreated IDH did not differ by degree of urbanization among women.

## Discussion

These data document a high prevalence of untreated hypertension in China, with the largest proportion having ISH (7.6%), representing more than an estimated 36 million Chinese adults aged 35 to 74 years (17 million men and 19 million women). We observed that ISH was especially prevalent among those 55 years or older, with higher prevalence among older women than among older men.

Few data have been published concerning ISH prevalence among developing countries. For each age group, the prevalence of ISH in China reported here is slightly higher than that reported from a random sample of an industrializing city in South Korea.<sup>11</sup> The prevalence of ISH among those aged 35 to 44 years in Ansan-city, South Korea, was 0.71%, as compared with 2.0% among men and 2.1% among women in the current study; and among those 65 to 74 years, ISH prevalence was 12.4% in Ansan-city compared with 19.5% among men and 24.7% among women in the current study. In addition, the prevalence of ISH in China reported here is dramatically higher than that reported from a two-city study in rural Thailand, where the prevalence of ISH among those aged 30 to 65 years was 1.0%.<sup>12</sup> However, differences in measurement methods may impede direct comparison among studies. The higher prevalence estimates in the current study may represent increased westernization in China compared with the earlier studies in Korea and Thailand. However, as neither the Korean study nor the Thai study used a nationally representative sample, comparison with the current study is tenuous. The patterns of prevalence reported here among the Chinese population are similar to data from both the U.S. population<sup>13</sup> and Korea,<sup>11</sup> which report higher prevalence of ISH with increasing age as well as higher ISH prevalence among women versus men.

Isolated systolic hypertension, more so than IDH, increases the risk of stroke, coronary heart disease, and end-stage renal disease morbidity and mortality in both Western and Asian populations.<sup>5,14</sup> Additionally, ISH may be more difficult to control.<sup>15</sup> However, the risks associated with ISH can clearly be decreased with BP lowering treatment. The Systolic Hypertension in the Elderly Program demonstrated a 36% reduction in the rates of stroke and a 32% reduction in the rates of cardiovascular disease,<sup>16</sup> whereas the Systolic Hypertension in Europe Trial demonstrated a 42% reduction in stroke and a 26% reduc-

tion in the rates of both fatal and nonfatal cardiovascular disease with treatment of ISH.<sup>17</sup> Treatment benefits were similarly large in the Chinese population. The Systolic Hypertension in China Trial demonstrated a 38% reduction in stroke incidence, a 58% reduction in stroke mortality, and a 37% reduction in the rates of fatal and nonfatal cardiovascular disease with treatment of ISH.<sup>18</sup>

Despite these treatment benefits, previously reported InterASIA data indicate that only 28% of Chinese hypertensive subjects are on treatment, with only 8.1% achieving BP control.<sup>3</sup> The high prevalence of ISH noted here demonstrates the large number of Chinese adults at substantially increased risk for cardiovascular disease. Additionally, these prevalence numbers are only for untreated hypertensive subjects. If treated hypertensive subjects are included, the prevalence of ISH is much higher. These data underscore the critical need for enhanced physician education in China as to the importance of hypertension screening, the benefits of treatment on the risks associated with ISH, and the value of closely monitoring patients who are on antihypertensive treatments to ensure eventual control of their BP.

Although the prevalence of untreated ISH was high among the Chinese population, these data indicated that the majority of cases for all hypertension subtypes could be categorized as stage 1 rather than stage 2 hypertension according to the JNC-VII criteria.<sup>9</sup> Our data are similar to data reported in the United States using the JNC-V criteria, where for all age groups, among both men and women, stage 1 hypertension was found to be more common than stage 2.<sup>19</sup>

Although ISH was the predominant hypertension subtype among our data, similar to that in the U.S. population,<sup>13</sup> our study documents a higher prevalence of SDH among the older age groups than those reported in the United States. Franklin et al report an SDH prevalence of approximately 3% among individuals 60 to 69 years in the U.S. population,<sup>13</sup> whereas our data indicate that the prevalence of SDH was 7.7% for Chinese women and 11.7% for Chinese men aged 65 to 74 years. Despite the larger prevalence of diastolic hypertension (whether alone or in combination with systolic hypertension), our data document that for every BP subtype including IDH, mean SBP values increased whereas mean DBP values decreased with increasing age group.

These data demonstrated higher prevalence of treated hypertension as well as untreated SDH, IDH, and ISH (women, only) in northern China versus southern China. Previous national surveys in China, including previously published InterASIA data have indicated higher overall hypertension prevalence in northern versus southern China.<sup>4,20</sup> These data extend those findings to the specific hypertension subtypes underlying the overall hypertension prevalence.

Although data on many developing countries, including national surveys from China, have indicated a higher prevalence of hypertension among urban-dwelling residents

versus rural-dwelling residents,<sup>4,21-23</sup> previously published data from the InterASIA population did not demonstrate significant urban-rural differences in the overall prevalence of hypertension.<sup>20</sup> This finding was attributed to a rapid increase in hypertension rates among rural residents between the last Chinese national survey and InterASIA, most likely resulting from an increased exposure on the part of rural residents to dietary and work-related lifestyles previously associated with urban living.<sup>20</sup> Our data stratifying overall hypertension rates by treated and untreated hypertension subtypes, however, document a higher prevalence of untreated SDH (women, only) and ISH among rural residents and a higher prevalence of treated hypertension in urban residents. The higher prevalence of untreated SDH and ISH among rural residents is likely due to the lower treatment rates in rural areas documented here.

In conclusion, the present study documents a high prevalence of ISH among Chinese adults, affecting more than an estimated 36 million individuals. Given the risks associated with ISH, these prevalence numbers indicate a sizeable population risk for coronary heart disease and stroke that is highly preventable with treatment. These data, taken in light of the low hypertension treatment and control rates,<sup>3</sup> underscore the critical need for enhanced physician education and screening programs in China.

## Appendix

### Members of the InterASIA Collaborative Group

#### *Steering Committee Members*

Jiang He (Co-Principal Investigator), Paul K. Whelton (Co-Principal Investigator), Dale Glasser, Dongfeng Gu, Stephen MacMahon, Bruce Neal, Rajiv Patni, Robert Reynolds, Paibul Suriyawongpaisal, Xigui Wu, Xue Xin, and Xin-Hua Zhang.

#### *Participating Institutes and Principal Staff*

Tulane University, New Orleans, LA: Drs. Jiang He (PI), Lydia A. Bazzano, Jing Chen, Paul Muntner, Kristi Reynolds, Paul K. Whelton, and Xue Xin. University of Sydney, Sydney, Australia: Drs. Stephen MacMahon (PI), Neil Chapman, Bruce Neal, Mark Woodward and Xin-Hua Zhang. China: Fuwai Hospital and Cardiovascular Institute, Chinese Academy of Medical Sciences and Peking Union Medical College: Drs. Dongfeng Gu (PI), Xigui Wu, Wenqi Gan, Shaoyong Su, Donghai Liu, Xiufang Duan, Guangyong Huang. Beijing: Yifeng Ma, Xiu Liu, Zhongqi Tian, Xiaofei Wang, Guangyong Fan, Jiaqiang Wang, Changlin Qiu. Fujian: Ling Yu, Xiaodong Pu, Xinsheng Bai, Linsen Li, Wei Wu. Jilin: Lihua Xu, Jing Liu, Yuzhi Jiang, Yuhua Lan, Lijiang Huang, Huaifeng Yin. Sichuan: Xianping Wu, Ying Deng, Jun He, Ningmei Zhang, Xiaoyan Yang. Shandong: Xiangfu Chen, Renmin Wei, Xingzhong Liu, Huaiyu Ruan, Ming Li, Changqing Zhang. Guangxi: Naying Chen, Xiaoyu Meng, Fangqing Wei, Yongfang Xu. Qinghai: Tianyi Wu, Jianjiang Ji, Chaoxiu Shi, Ping Yang. Hubei: Ligui Wang,

Yuzhi Hu, Li Yan, Yanjuan Wang. Jiangsu: Cailiang Yao, Liangcai Ma, Jun Zhang, Mingao Xu, Zhengyuan Zhou. Shanxi: Jianjun Mu, Zhexion Wang, Huicang Li, Zirui Zhao.

## References

1. Murray CJ, Lopez AD: Mortality by cause for eight regions of the world: Global Burden of Disease Study. *Lancet* 1997;349:1269–1276.
2. Murray CJ, Lopez AD: Global pattern of cause of death and burden of disease in 1990, with projections to 2020 investing in health research and development. Report of the ad hoc Committee on Health Research Relation to Future Intervention Options. Geneva: World Health Organization, 1996.
3. Gu D, Reynolds K, Wu X, Chen J, Duan X, Muntner P, Huang G, Reynolds RF, Su S, Whelton PK, He J, InterASIA Collaborative Group: The International Collaborative Study of Cardiovascular Disease in ASIA. Prevalence, awareness, treatment, and control of hypertension in China. *Hypertension* 2002;40:920–927.
4. Wu X, Duan X, Gu D, Hao J, Tao S, Fan D: Prevalence of hypertension and its trends in Chinese populations. *Int J Cardiol* 1995;52:39–44.
5. He J, Whelton PK: Elevated systolic BP as a risk factor for cardiovascular and renal disease. *J Hypertens* 1999;17:S7–S13.
6. He J, Neal B, Gu D, et al: International Collaborative Study of Cardiovascular Disease in Asia: design and rationale. *Ethnic Dis* 2004;14:260–268.
7. Perloff D, Grim C, Flack J, Frohlich ED, Hill M, McDonald M, Morgenstern BZ: Human BP determination by sphygmomanometry. *Circulation* 1993;88:2460–2470.
8. The Sixth Report of the Joint National Committee on Prevention, Detection, Evaluation, and Treatment of High Blood Pressure. *Arch Intern Med* 1997;157:2413–2446.
9. Chobanian AV, Bakris GL, Black HR, Cushman WC, Green LA, Izzo JL Jr, Jones DW, Materson BJ, Oparil S, Wright JT Jr, Roccella EJ, National Heart, Lung, and Blood Institute, National High Blood Pressure Education Program Coordinating Committee: The Seventh Report of the Joint National Committee on Prevention, Detection, Evaluation, and Treatment of High Blood Pressure: the JNC 7 report. *JAMA* 2003;289:2560–2572.
10. Plan and operation of the Third National Health and Nutrition Examination Survey, 1998–1994. National Center for Health Statistics. *Vital Health Stat* 1994;1(32).
11. Jo I, Ahn Y, Lee J, Shin KR, Lee HK, Shin C: Prevalence, awareness, treatment, control and risk factors of hypertension in Korea: the Ansan study. *J Hypertens* 2001;19:1523–1532.
12. Polpinit A, Ungsununtawiwat M, Bhuripanyo K, Bhuripanyo P, Tatsanavivat P, Thrasana A: The prevalence and risk factors of hypertension in population aged 30–65 years in rural area, Amphoe Phon, Khon Kaen. *J Med Assoc Thai* 1992;75:259–266.
13. Franklin SS, Jacobs MJ, Wong ND, L'Italien GJ, Lapuerta P: Predominance of isolated systolic hypertension among middle-aged and elderly US hypertensive subjects: analysis based on National Health and Nutrition Examination Survey (NHANES) III. *Hypertension* 2001;37:869–874.
14. Hozawa A, Ohkubo T, Nagai K, Kikuya M, Matsubara M, Tsuji I, Ito S, Satoh H, Hisamichi S, Imai Y: Prognosis of isolated systolic and isolated diastolic hypertension as assessed by self-measurement of BP at home: the Ohasama study. *Arch Intern Med* 2000;160:3301–3306.
15. Black HR: The paradigm has shifted, to systolic BP. *Hypertension* 1999;34:386–387.

16. SHEP Cooperative Research Group: Prevention of stroke by anti-hypertensive drug treatment in older persons with isolated systolic hypertension. Final results of the Systolic Hypertension in the Elderly Program (SHEP). SHEP Cooperative Research Group. *JAMA* 1991;265:3255–3264.
17. Staessen JA, Fagard R, Thijs L, Celis H, Arabidze GG, Birkenhager WH, Bulpitt CJ, de Leeuw PW, Dollery CT, Fletcher AE, Forette F, Leonetti G, Nachev C, O'Brien ET, Rosenfeld J, Rodicio JL, Tuomilehto J, Zanchetti A: Randomised double-blind comparison of placebo and active treatment for older patients with isolated systolic hypertension. The Systolic Hypertension in Europe (Syst-Eur) Trial Investigators. *Lancet* 1997;350:757–764.
18. Liu L, Wang JG, Gong L, Liu G, Staessen JA: Comparison of active treatment and placebo in older Chinese patients with isolated systolic hypertension. Systolic Hypertension in China (Syst-China) Collaborative Group. *J Hypertens* 1998;16:1823–1829.
19. Burt VL, Whelton P, Roccella EJ, Brown C, Cutler JA, Higgins M, Horan MJ, Labarthe D: Prevalence of hypertension in the US adult population. Results from the Third National Health and Nutrition Examination Survey, 1988–1991. *Hypertension* 1995;25:305–313.
20. Reynolds K, Gu D, Muntner P, Wu X, Chen J, Huang G, Duan X, Whelton P, He J, for the InterASIA Collaborative Group: Geographic variations in the prevalence, awareness, treatment and control of hypertension in China. *J Hypertens* 2003;21:1273–1281.
21. Fuentes R, Ilmanemi N, Laurikainen E, Tuomilehto J, Nissinen A: Hypertension in developing economies: a review of population-based studies carried out from 1980 to 1998. *J Hypertens* 2000;18:521–529.
22. Wu Y, Lu C, Gau R, Yu J, Liu G: Nation-wide hypertension screening in China during 1979–1980. *Chin Med J (Engl)* 1982;95:108.
23. Tao S, Wu X, Duan X, Fang W, Hao J, Fan D, Wang W, Li Y: Hypertension prevalence and status of awareness, treatment and control in China. *Chin Med J (Engl)* 1995;108:483–489.
